# Supplementary material
Source: publisher site journal article supplement (https://mbmg.pensoft.net/article/download/suppl/3759268/)
Supplement: Supplementary file 1

## Sheet: UK
MOTU ID	Assigned Taxonomy (> 98% identity BOLD and genbank blast hit)	Trophic level classification (based on assigned taxonomy or on family closest match for MOTUs with < 98 % identity BOLD and genbank blast hit)	Total number of reads	Sequence	Mummy ID
					MU238_S72.fq	MU239_S73.fq	MU241_S74.fq	MU242_S75.fq	MU243_S76.fq	MU244_S77.fq	MU245_S78.fq	MU246_S79.fq	MU247_S80.fq	MU248_S81.fq	MU251_S82.fq	MU252_S83.fq	MU254_S84.fq	MU255_S85.fq	MU258_S86.fq	MU260_S87.fq	MU261_S88.fq	MU266_S89.fq	MU267_S90.fq	MU269_S91.fq	MU270_S92.fq	MU271_S93.fq	MU273_S94.fq	MU274_S95.fq	MU275_S96.fq	MU280_S97.fq	MU281_S98.fq	MU283_S99.fq	MU284_S65.fq	MU-48_S51.fq	MU-49_S52.fq	MU-53_S53.fq	MU-54_S54.fq	MU-56_S55.fq	MU-57_S56.fq	MU-59_S57.fq	MU-62_S58.fq	MU-63_S59.fq	MU-65_S60.fq	MU-77_S61.fq	MU-81_S62.fq	MU-82_S63.fq	MU-84_S64.fq	MU-89_S66.fq	MU-90_S67.fq
OTU_2	Diaeretiella rapae	third trophic level	800384	GCTTTCCCACGAATAAATAATATAAGATTTTGATTATTAATTCCATCTTTAATTTTATTATTAGTAAGAGGTTTAATAAATTCTGGTGTTGGTACTGGTTGAACTGTTTACCCTCCTTTATCATTAACTTTAGGACATAGAGGTGTAGCAGTAGATTTTGCTATTTTTTCTTTGCATTTAGCGGGTATTTCTTCAATTATAGGAGCTATTAATTTTATTAGAACTATTTTTAATATGCGGTGTTATAATGTTAAAATAGATCAGATTTCTTTATTAATTTGATCAGTTTTAATTACTGCTATTTTATTGTTATTATCTTTACCTGTATTAGCAGGTGCTATTACTATATTATTAACTGATCGAAATTTAAATACTACTTTTTTTGATTTTGCTGGGGGA…	1	1	1	1	1	1	1	1	1	1	1	1	1	1	1	1	1	1	1	1	1	1	1	1	1	1	1	1	1	1	1	1	1	1	1	1	1	1	1	1	1	1	1	1	1
OTU_34	Alloxysta leunisii	fourth trophic level	1799	GCTTTCCCACGAATAAATAATATAAGGTTTTGATTATTGATCCCGTCATTAATTTTATTAATTTCAAGAATATTTATTGATCAAGGAGCTGGTACAGGATGGACTGTTTACCCCCCATTATCTTCTAATTTAGGTCATTCTGGGATTTCTGTCGATTTAACAATTTTTTCTTTACATATAAGAGGGGTTTCTTCAATTTTAGGGTCTATTAATTTTATTACTACAATTTTAAATATGCGACCTGTAAATTTATCAATAGATAAAATCTCATTATTTATTTGATCTATTTTATTAACAACAATTTTATTATTATTATCATTGCCTGTTCTAGCTGGGGGGATTACTATATTATTATTTGATCGAAATTTAAATACTTCTTTTTTTGACCCTATAGGGGGC…	1	1	1	1	1	1	1	1	1	1	1	1	1	1	1	1	0	1	1	1	1	1	0	1	0	1	1	1	1	1	0	0	0	1	0	0	0	0	1	1	0	0	1	0	0
OTU_35	Brevicoryne brassicae	second trophic level	1025	GCTTTCCCACGAATAAATAATATTAGATTTTGATTACTCCCTCCATCACTAATAATAATAATTTGTAGTTTTTTAATTAATAATGGAACAGGAACAGGATGAACTATTTATCCACCTCTATCAAATAATATTGCTCATAATAATATTTCAGTTGATTTAACTATTTTTTCTTTACATTTAGCAGGAATTTCATCAATTTTAGGAGCAATTAATTTTATCTGTACAATTCTAAATATAATACCTAATAATATAAAATTAAATCAAATTCCTCTTTTTCCATGATCAATTTTAATTACAGCTATTTTATTAATCTTATCTCTCCCAGTATTAGCTGGAGCAATTACAATATTATTAACTGATCGAAATTTAAATACTTCATTTTTTGATCCAGCAGGAGGA…	1	1	1	1	1	1	1	1	1	1	1	0	1	1	0	0	0	0	0	0	0	0	0	1	1	1	0	0	0	0	0	0	0	0	0	0	0	0	0	1	0	0	0	0	0
OTU_36	Diaeretiella rapae	third trophic level	141	TAAACTTCTGGATGTCCAAAAAATCAAAATAAATGTTGATATAAAATAGGATCACCTCCCCCAGCAAAATCAAAAAAAGTAGTATTTAAATTTCGATCAGTTAATAATATAGTAATAGCACCTGCTAATACAGGTAAAGATAATAACAATAAAATAGCAGTAATTAAAACTGATCAAATTAATAAAGAAATCTGATCTATTTTAACATTATAACACCGCATATTAAAAATAGTTCTAATAAAATTAATAGCTCCTATAATTGAAGAAATACCCGCTAAATGCAAAGAAAAAATAGCAAAATCTACTGCTACACCTCTATGTCCTAAAGTTAATGATAAAGGAGGGTAAACAGTTCAACCAGTACCAACACCAGAATTTATTAAACCTCTTACTAATAAT…	0	0	0	1	1	1	1	0	1	0	1	0	1	1	0	1	0	0	1	0	1	1	0	1	1	0	0	1	1	1	0	0	1	1	1	1	0	1	0	1	1	1	1	0	0
OTU_37	Diaeretiella rapae	third trophic level	10	GCTTTCCCACGAATAAATAATATAAGATTTTGATTATTAATTCCATCTTTAATTTTATTATTAGTAAGAGGTTTAATAAATTCTGGTGTTGGTACTGGTTGAACTGTTTACCCTCCTTTATCATTCCCTTTCGGCCATCGAGGTGTAGCAGTAGATTTTGCTATTTTTTCTTTGCATTTAGCGGGTATTTCTTCAATTCTCGGCGCTATTCCTTTTCTTCGACCTATTTTTAATATGCGGTGTTATAATGTTAAAATAGATCAGATTTCTTTATTAATTTGATCAGTTTTAATTACTGCTATTTTATTGTTATTATCTTTACCTGTATTAGCAGGTGCTATTACTATATTATTAACTGATCGAAATTTAAATACTACTTTTTTTGATTTTGCTGGGGGA…	0	1	0	1	1	0	0	0	1	0	1	0	1	0	0	1	0	0	0	0	0	0	0	0	0	0	0	0	0	1	0	1	0	0	0	1	0	0	0	0	0	0	0	0	0
OTU_38	Diaeretiella rapae	third trophic level	23	GCTTTCCCACGAATAAATAATATAAGATTTTGATTATTAATTCCATCTTTAATTTTATTATTAGTAAGAGGTTTAATAAATTCTGGTGTTGGTACTGGTTGAACTGTTTACCCTCCTTTATCATTAACTTTAGGACATAGAGGTGTATCAGTAGATTTTGCTATTTTTTCTTTGCATTTAGCGGGTATTTCTTCAATTATAGGAGCTATTAATTTTATTAGAACTATTTTTAATATGCGGTGTTATAATGTTAAAATAGATCAGATTTCTTTATTAATTTGATCAGTTTTAATTACTGCTATTTTATTGTTATTATCTTTACCTGTATTAGCAGGTGCTATTACTATATTATTATTTGATCGAAATTTAAATACTTCTTTTTTTGACCCTATAGGGGGC…	0	1	0	1	0	0	1	0	0	0	0	0	0	0	0	0	0	0	0	0	0	0	0	0	0	0	0	0	0	0	0	0	0	0	0	0	0	0	0	0	0	0	0	0	0
OTU_39	/	third trophic level	80	GCTTTCCCACGAATAAATAATATAAGAGGGGGAGGAGGAAGGCCAGCGGGAATTTTATTATTAGTAAGAGGTTTAATAAATTCTGGTGTTGGTACTGGTTGAACTGTTTACCCTCCTTTATCATTAACTTTAGGACATAGAGGTGTAGCAGTAGATTTTGCTATTTTTTCTTTGCATTTAGCGGGTATTTCTTCAATTATAGGAGCTATTAATTTTATTAGAACTATTTTTAATATGCGGTGTTATAATGTTAAAATAGATCAGATTTCTTTATTAATTTGATCAGTTTTAATTACTGCTATTTTATTGTTATTATCTTTACCTGTATTAGCAGGTGCTATTACTATATTATTAACTGATCGAAATTTAAATACTACTTTTTTTGATTTTGCTGGGGGA…	1	1	0	0	1	0	1	1	1	0	1	0	1	1	0	1	0	0	1	1	1	1	1	1	1	1	1	1	1	1	0	0	1	1	1	1	1	1	0	1	1	1	1	0	1
OTU_43	Aphidius rhopalosiphi	third trophic level	3	GCTTTCCCACGAATAAATAATATAAGATTTTGATTATTAATTCCATCTTTAATTTTATTATTAATTAGAGGTTTAATAAATTCAGGTGTTGGTACAGGTTGAACTGTTTATCCTCCTTTATCGTTGACATTAGGCCATAGAGGTGTAGCGGTAGATTTTGCTATTTTTTCATTACATTTAGCAGGTATTTCTTCTATTATAGGAGCTATTAATTTTATTAGAACTATTTTTAATATACGATCTTATAATATTAAAATAGATCAAATTTCATTATTAATTTGATCAGTATTAATTACTGCTATTTTGTTATTATTATCATTACCTGTTTTAGCGGGAGCTATTACTATATTATTGACAGATCGTAATTTAAATACTACTTTTTTTGATTTTGCTGGTGGC…	0	0	0	1	0	0	0	0	0	0	0	0	0	0	0	1	0	0	0	0	0	0	0	0	0	0	0	0	0	0	0	0	0	0	0	0	0	0	0	0	0	0	0	0	0
OTU_44	Alloxysta tscheki	fourth trophic level	14	GCTTTCCCACGATAAATAATATAAGATTTTGGTTATTGATCCCGTCATTAATTTTATTAATTTCAAGGATATTTATTGATCAAGGGGCTGGGACAGGGTGAACTGTTTACCCTCCATTATCTTCTAATTTAGGTCACTCTGGGATTTCTGTCGATTTAACAATTTTTTCTTTACATATAAGAGGAGTTTCTTCAATTTTAGGGTCTATTAATTTTATTACTACAATTTTAAATATACGACCTGTAAATTTATCAATAGATAAAATTTCATTATTTATTTGATCTATCTTATTAACAACAATTTTATTATTATTATCATTGCCCGTGCTAGCCGGAGGGATTACTATATTGTTATTTGATCGAAATTTAAATACTTCTTTTTTTGACCCTATAGGAGGGG…	1	1	1	1	0	0	0	0	0	0	0	0	0	0	0	0	0	0	0	0	0	0	0	0	0	0	0	0	0	0	0	0	0	0	0	0	0	0	0	0	0	0	0	0	0
OTU_72	Diaeretiella rapae	third trophic level	3	GCTTTCCCACGAATAAATAATATAAGATTTTGATTATTAATTCCATCTTTAATTTTATTATTAGTAAGAGGTTTAATAAATTCTGGTGTTGGTACTGGTTGAACTGTTTATCCTCCTTTATCATTAACTTTAGGACATAGAGGTGTAGCAGTAGATTTTGCTATTTTTTCTTTGCATTTAGCGAACTATTTTTAATATGCGGTGTTATAATGTTAAAATAGATCAGATTTCTTTATTAATTTGATCAGTTTTAATTACTGCTATTTTATTATTATTATCTTTACCTGTATTAGCAGGTGCTATTACTATATTATTAACTGATCGAAATTTAAATACTACTTTTTTTGATTTTGCTGGGGGAGGTGATCCTATTTTATATCAACATTTATTTTGATTTTT…	0	0	0	0	0	0	0	0	0	0	0	0	0	0	0	0	0	0	0	0	0	0	0	0	0	0	0	0	0	0	0	0	0	0	0	0	0	0	0	0	0	0	0	0	0
OTU_73	Diaeretiella rapae	third trophic level	19	GCTTTCCCACGAATAAATAATATAAGATTTTGATTATTAATTCCATCTTTAATTTTATTATTAGTAAGAGGTTTAATAAATTCTGGTGTTGGTACTGGTTGAACTGTTTACCCTCCTTTATCATTAACTTTAGGACATAGAGGTGTAGCAGTAGATTTTGCTATTTTTTCTTTGCATTTAGCGGGTATTTCTTCAATTATAGGAGCTATTAATTTTATTAGAACTATTTTTAATATGCGGTGTTATAATGTTAAAATAGATCAGATTTCTTTATTAATTTGATCAGTTTTAATTACTGCTATTTTATTGTTATTATCTTTACCTGTATTAGCAGGTGCTATTACTATATTATTAACTGATCGAAATTTAAATACTACTTTTTTTGATTTTTTGGACATC…	0	1	0	0	0	0	0	0	0	0	1	0	1	1	0	0	0	0	1	0	1	1	0	1	0	0	0	1	0	1	0	0	1	0	0	0	0	1	0	1	0	0	1	0	0
OTU_74	Diaeretiella rapae	third trophic level	2	GCTTTCCCACGAATAAATAATATAAGATTTTGATTATTAATTCCATCTTTAATTTTATTATTAGTAAGAGGTTTAATAAATTCTGGTGTTGGTACTGGTTGAACTGTTTACCCTCCTTTATCATTAACTTTAGGACATAGAGGTGTAGCAGTAGATTTTGCTATTTTTTCTTTGCATTTAGCGGGTATTTCTTCAATTATAGGAGCTATTAATTTTATTAGAACTATTTTTAATATGCGGTGTTATAATGTTAAAATAGATCAGATTTCTTTATTAATTTGATCAGTTTTAATTACTGCTATTTTATTGTTATTATCTTTACCTGTATTAGCAGGTGCTATTACTATATTATTAACTGATCGAAATTTTGATTTTTTGGACATCCAGAAGTTTA	0	0	0	0	0	0	0	0	0	0	0	0	0	0	0	0	0	0	0	0	0	0	0	0	0	0	0	0	0	0	0	0	0	0	0	0	0	0	0	0	0	0	0	0	0
OTU_75	Diaeretiella rapae	third trophic level	11	GCTTTCCCACGAATAAATAATATAAGATTTTGCTATTTTTTCTTTGCATTTAGCGGGTATTTCTTCAATTATAGGAGCTATTAATTTTATTAGAACTATTTTTAATATGCGGTGTTATAATGTTAAAATAGATCAGATTTCTTTATTAATTTGATCAGTTTTAATTACTGCTATTTTATTGTTATTATCTTTACCTGTATTAGCAGGTGCTATTACTATATTATTAACTGATCGAAATTTAAATACTACTTTTTTTGATTTTGCTGGGGGAGGTGATCCTATTTTATATCAACATTTATTTTGATTTTTTGGACATCCAGAAGTTTA	0	0	0	0	0	0	0	0	0	0	0	0	1	1	0	0	0	0	1	0	0	0	0	0	0	0	0	0	0	1	0	0	0	0	0	0	0	1	0	0	0	0	0	0	0
OTU_76	Diaeretiella rapae	third trophic level	8	GCTTTCCCACGAATAAATAATATAAGATTTTGATTATTAATTCCATCTTTAATTTTATTATTAGTAAGAGGTTTAATAAATTCTGGTGTTGGTACTGGTTGAACTGTTTACCCTCCTTTATCATTAACTTTAGGACATAGAGGTGTAGCAGTAGATTTTGCTATTTTTTCTTTGCATTTAGCGGGTATTTCTTCAATTATAGGAGCTATTAATATAATAAGAACTGATCGAAATTTAAATACTACTTTTTTTGATTTTGCTGGGGGAGGTGATCCTATTTTATATCAACATTTATTTTGATTTTTTGGACATCCAGAAGTTTA	0	0	0	0	0	0	0	0	0	0	0	0	0	1	0	1	0	0	0	0	1	1	0	0	0	0	0	0	1	0	0	0	0	0	0	0	0	0	0	0	0	0	0	0	0
OTU_77	Diaeretiella rapae	third trophic level	8	GCTTTCCCACGAATAAATAATATAAGATTTTGATTATTAATTCCATCTTTAATTTTATTATTAGTAAGAGGTTTAATAAATTCTGGTGTTGGTACTGGTTGAACTGTTTACCCTCCTTTATCATTAACTTTAGGACATAGAGGTGTAGCAGTAGATTTTGCTATTTTATTGTTATTATCTTTACCTGTATTAGCAGGTGCTATTACTATATTATTAACTGATCGAAATTTAAATACTACTTTTTTTGATTTTGCTGGGGGAGGTGATCCTATTTTATATCAACATTTATTTTGATTTTTTGGACATCCAGAAGTTTA	0	0	0	0	0	0	0	0	1	0	0	0	0	0	0	1	0	0	0	0	0	0	0	0	0	0	0	0	0	0	0	0	0	1	0	0	0	0	0	0	0	0	0	0	0
OTU_78	Diaeretiella rapae	third trophic level	6	GCTTTCCCACGAATAAATAATATAAGATTTTGATTATTAATTCCATCTTTAATTTTATTATTAGTAAGAGGTTTAATAAATTCTGGTGTTGGTACTGGTTGAACTGTTTATCCTCCTTTATCATTAACTTTAGGACATAGAGGTGTAGCAGTAGATTTTGCTATTTTTTCTTTGCATTTAGCAGGTGCTATTACTATATTATTAACTGATCGAAATTTAAATACTACTTTTTTTGATTTTGCTGGGGGAGGTGATCCTATTTTATATCAACATTTATTTTGATTTTTTGGACACCAGAAGTTTA	0	0	0	0	0	0	0	0	0	0	0	0	0	0	0	1	0	0	0	0	0	0	0	0	0	0	0	1	0	0	0	0	0	0	0	0	0	0	0	0	0	0	0	0	0
OTU_79	Diaeretiella rapae	third trophic level	21	GCTTTCCCACGAATAAATAATATAAGATTTTGATTATTAATTCCATCTTTAATTTTATTAGAACTATTTTTAATATGCGGTGTTATAATGTTAAAATAGATCAGATTTCTTTATTAATTTGATCAGTTTTAATTACTGCTATTTTATTGTTATTATCTTTACCTGTATTAGCAGGTGCTATTACTATATTATTAACTGATCGAAATTTAAATACTACTTTTTTTGATTTTGCTGGGGGAGGTGATCCTATTTTATATCAACATTTATTTTGATTTTTTGGACATCCAGAAGTTTA	0	0	0	0	0	0	0	0	1	0	1	0	1	1	0	1	0	0	1	0	0	0	0	1	1	0	0	0	0	0	0	0	1	0	0	0	0	0	0	0	0	0	1	0	0
OTU_80	Diaeretiella rapae	third trophic level	2	GCTTTCCCACGAATAAATAATATAAGATTTTGATTATTAATTCCATCTTTAATTTTATTATTAGTAAGAGGTTTAATAAATTCTGGTGTTGGTACTGGTTGAACTGTTTACCCTCCTTTATCATTATCTTTACCTGTATTAGCAGGTGCTATTACTATATTATTAACTGATCGAAATTTAAATACTACTTTTTTTGATTTTGCTGGGGGAGGTGATCCTATTTTATATCAACATTTATTTTGATTTTTTGGACATCCAGAAGTTTA	0	0	0	0	0	0	0	0	0	0	0	0	1	1	0	0	0	0	0	0	0	0	0	0	0	0	0	0	0	0	0	0	0	0	0	0	0	0	0	0	0	0	0	0	0
OTU_81	Diaeretiella rapae	third trophic level	7	GCTTTCCCACGAATAAATAATATAAGATTTTGATTATTAATTCCATCTTTAATTTTATTATTAGTAAGAGGTTTAATAAATTCTGGTGTTGGTACTGGTTGAACTGTTTACCCTCCTTTATCATTAACTTTAGGACATAGAGGTGTAGCAGTAGATTTTGCTATTTTTTCTTTGCATTTAGCGGGGGGAGGTGATCCTATTTTATATCAACATTTATTTTGATTTTTTGGACATCCAGAAGTTTA	0	0	0	0	0	0	1	0	0	0	0	0	0	1	0	1	0	0	0	0	0	0	0	0	0	0	0	1	0	0	0	0	0	0	0	0	0	0	0	0	0	1	1	0	0
OTU_82	Diaeretiella rapae	third trophic level	3	GCTTTCCCACGAATAAATAATATAAGATTTTGATTATTAATTCCATCTTTAATTTTATTATTAGTAAGAGGTTTAATAAATTCTGGTGTTGGTACTGGTTGAACTGTTTACCCTCCTTTATCATTAACTTTAGGACATAGAGGTGTAGCAGTAGATTTTGCTACTTTTTTTGATTTTGCTGGGGGAGGTGATCCTATTTTATATCAACATTTATTTTGATTTTTTGGACATCCAGAAGTTTA	0	0	0	0	0	0	0	0	0	0	0	0	0	1	0	0	0	0	0	0	0	0	0	0	0	0	0	0	0	0	0	0	1	0	0	0	0	0	0	0	0	0	0	0	0
OTU_83	Diaeretiella rapae	third trophic level	2	GCTTTCCCACGAATAAATAATATAAGATTTTGATTATTAATTCCATCTTTAATTTTATTATTAGTAAGAGGTTTAATAAATTCTGGTGTTGGTACTGGTTGAACTGTTTACCCTCCTTTATCATTAACTTTAGGACATAGAGGTGTAGCAGTAGATTTTGCTATTTTTTCTTTACATTTAGCGGGTATTTCTTCAATTATAGGAGCTATTAATTTTGATTTTTTGGACATCCAGAAGTTTA	0	0	0	0	0	0	0	0	0	0	0	0	0	1	0	0	0	0	0	0	0	0	0	0	0	0	0	0	0	0	0	0	0	0	0	0	0	0	0	0	0	0	0	0	0
OTU_85	Diaeretiella rapae	third trophic level	63	GCTTTCCCACGAATAAATAATATAAGATTTTGATTATTAATTCCATCTTTAATTTTATTATTAGTAAGAGGTTTAATAAATTCTGGTGTTGGTACTGGTTGAACTGTTTACCCTCCTTTATCATTAACTTTAGGACATAGAGGTGTAGCAGTAGATTTTGCTGGGGGAGGTGATCCTATTTTATATCAACATTTATTTTGATTTTTTGGACATCCAGAAGTTTA	0	0	0	1	1	1	1	0	0	0	1	0	1	1	0	1	0	0	0	0	1	0	0	1	0	0	0	1	1	1	0	0	1	1	0	0	0	0	0	1	1	0	0	0	0
OTU_86	Diaeretiella rapae	third trophic level	2	GCTTTCCCACGAATAAATAATATAAGATTTTGATTATTAATTCCATCTTTAATTTTATTATTAGTAAGAGGTTTAATAAATTCTGGTGTTGGTACTGGTTGAACTGTTTACCCTCCTTTATCATTAACTTTAGGACATAGAGGTGTAGCAGTAGATTTTGCTATTTTTTCTTTGCATTTAGCGGGTATTTTGGACATCCAGAAGTTTA	0	0	0	0	0	0	0	0	0	0	0	0	0	0	0	0	0	0	0	0	0	0	0	0	0	0	0	1	0	0	0	0	0	0	0	0	0	0	0	0	0	0	0	0	0
OTU_87	Diaeretiella rapae	third trophic level	2	GCTTTCCCACGAATAAATAATATAAGATTTTGATTATTAATTCCATCTTTAATTTTATTGTTATTATCTTTACCTGTATTAGCAGGTGCTATTACTATATTATTAACTGATCGAAATTTAAATACTACTTTTTTTGATTTTGCTGGGGGAGGTGATCCTATTTTATATCAACATTTATTTTGATTTTTTGGACATCCAGAAGTTTA	0	0	0	0	0	0	0	0	0	0	0	0	0	0	0	1	0	0	0	0	1	0	0	0	0	0	0	0	0	0	0	0	0	0	0	0	0	0	0	0	0	0	0	0	0
[truncated: 4 more columns]

## Sheet: NZ
MOTU ID	Assigned Taxonomy (> 98% identity BOLD and genbank blast hit)	Trophic level classification (based on assigned taxonomy or on family closest match for MOTUs with < 98 % identity BOLD and genbank blast hit)	Total number of reads	Sequence	Mummy ID
					MU-102_S8.fq	MU-104_S9.fq	MU-110_S10.fq	MU-111_S11.fq	MU-112_S12.fq	MU-113_S13.fq	MU-114_S14.fq	MU-115_S15.fq	MU-118_S16.fq	MU-119_S17.fq	MU-121_S18.fq	MU-122_S19.fq	MU-123_S20.fq	MU-124_S21.fq	MU-125_S22.fq	MU-126_S23.fq	MU-129_S24.fq	MU-130_S25.fq	MU141_S26.fq	MU142_S27.fq	MU149_S28.fq	MU150_S29.fq	MU153_S6.fq	MU156_S30.fq	MU167_S31.fq	MU169_S32.fq	MU171_S33.fq	MU173_S34.fq	MU176_S35.fq	MU178_S36.fq	MU182_S37.fq	MU190_S38.fq	MU191_S39.fq	MU194_S40.fq	MU195_S41.fq	MU196_S42.fq	MU-1_S1.fq	MU200_S43.fq	MU201_S44.fq	MU202_S45.fq	MU203_S46.fq	MU214_S47.fq	MU218_S48.fq	MU220_S49.fq	MU230_S50.fq
OTU_1	Diaeretiella rapae	third trophic level	5	GCTTTCCCACGAATAAATAATATAAGATTTTGATTATTAATTCCATCTTTAATTTTATTATTAGTAAGAGGTTTAATAAATTCTGGTGTTGGTACTGGTTGAACTGTTTACCCTCCTTTATCATTAACTTTAGGACATAGAGGTGTATCAGTAGATTTTGCTATTTTTTCTTTGCATTTAGCGGGTATTTCTTCAATTATAGGAGCTATTAATTTTATTAGAACTATTTTTAATATGCGGTGTTATAATGTTAAAATAGATCAGATTTCTTTATTAATTTGATCAGTTTTAATTACTGCTATTTTATTGTTATTATCTTTACCTGTATTAGCAGGTGCTATTACAGGTAAAGATAATAACAATAAAATAGCAGTAATTAAAACTGATCGAAATTTAAAT…	0	1	0	0	0	1	0	0	0	0	0	0	0	0	0	1	1	0	0	0	0	0	0	0	0	0	0	0	0	0	0	0	0	0	0	1	0	0	0	0	0	0	0	0	0
OTU_4	Diaeretiella rapae	third trophic level	3797	GCTTTCCCACGAATAACGAATAAATAATATAAGATTTTGATTATTAATTCCATCTTTAATTTTATTATTAGTAAGAGGTTTAATAAATTCTGGTGTTGGTACTGGTTGAACTGTTTACCCTCCTTTATCATTAACTTTAGGACATAGAGGTGTATCAGTAGATTTTGCTATTTTTTCTTTGCATTTAGCGGGTATTTCTTCAATTATAGGAGCTATTAATTTTATTAGAACTATTTTTAATATGCGGTGTTATAATGTTAAAATAGATCAGATTTCTTTATTAATTTGATCAGTTTTAATTACTGCTATTTTATTGTTATTATCTTTACCTGTATTAGCAGGTGCTATTACTATATTATTAACTGATCGAAATTTAAATACTACTTTTTTTGATTTTGC…	1	1	1	1	1	1	1	1	0	1	1	1	1	1	1	1	1	1	1	0	1	1	1	1	1	0	1	0	1	1	1	1	1	1	1	1	1	0	1	1	1	1	1	1	1
OTU_18	Diaeretiella rapae	third trophic level	641512	GCTTTCCCACGAATAAATAATATAAGATTTTGATTATTAATTCCATCTTTAATTTTATTATTAGTAAGAGGTTTAATAAATTCTGGTGTTGGTACTGGTTGAACTGTTTACCCTCCTTTATCATTAACTTTAGGACATAGAGGTGTATCAGTAGATTTTGCTATTTTTTCTTTGCATTTAGCGGGTATTTCTTCAATTATAGGAGCTATTAATTTTATTAGAACTATTTTTAATATGCGGTGTTATAATGTTAAAATAGATCAGATTTCTTTATTAATTTGATCAGTTTTAATTACTGCTATTTTATTGTTATTATCTTTACCTGTATTAGCAGGTGCTATTACTATATTATTAACTGATCGAAATTTAAATACTACTTTTTTTGATTTTGCTGGGGGA…	1	1	1	1	1	1	1	1	1	1	1	1	1	1	1	1	1	1	1	1	1	1	1	1	1	1	1	1	1	1	1	1	1	1	1	1	1	1	1	1	1	1	1	1	1
OTU_19	Alloxysta consobrina	fourth trophic level	22197	GCTTTCCCACGAATAAATAATATAAGGTTTTGATTATTGATCCCGTCATTAATTTTATTAATTTCAAGAATATTTATTGATCAAGGAGCTGGTACAGGATGGACTGTTTACCCCCCATTATCTTCTAATTTAGGTCATTCTGGGATTTCTGTCGATTTAACAATTTTTTCTTTACATATAAGAGGGGTTTCTTCAATTTTAGGGTCTATTAATTTTATTACTACAATTTTAAATATGCGACCTGTAAATTTATCAATAGATAAAATCTCATTATTTATTTGATCTATTTTATTAACAACAATTTTATTATTATTATCATTGCCTGTTCTAGCTGGGGGGATTACTATATTATTATTTGATCGAAATTTAAATACTTCTTTTTTTGACCCTATAGGGGGC…	0	1	1	1	1	1	1	0	1	0	1	1	1	1	0	1	1	1	1	1	0	1	1	1	1	1	1	1	1	1	1	1	1	1	1	1	0	0	1	1	1	1	1	1	1
OTU_20	Alloxysta consobrina	fourth trophic level	242	GCTTTCCCACGAATAAATAATATAAGGTTTTGATTATTGATCCCGTCATTAATTTTATTAATTTCAAGAATATTTATTGATCAAGGAGCTGGTACAGGATGGACTGTTTACCCCCCATTATCTTCTAATTTAGGTCATTCTGGGATTTCTGTCGATTTAACAATTTTTTCTTTACATATAAGAGGGGTTTCTTCAATTTTAGGGTCTATTAATTTTATTACTACAATTTTAAATATGCGACCTGTAAATTTATCAATAGATAAAATCTCATTATTTATTTGATCTATTTTATTAACAACAATTTTATTATTATTATCATTGCCTGTTCTAGCTGGGGGGATTACTATATTATTATTTGATCGAAATTTAAATACTTCTTTTTTTGACCCTAGAGGGGGC…	0	0	1	1	0	1	0	0	1	0	1	0	0	0	0	0	0	0	0	1	0	1	0	0	1	1	1	1	1	1	1	0	1	1	1	1	0	0	0	0	1	0	1	0	0
OTU_21	Diaeretiella rapae	third trophic level	202	TAAACTTCTGGATGTCCAAAAAATCAAAATAAATGTTGATATAAAATAGGATCACCTCCCCCAGCAAAATCAAAAAAAGTAGTATTTAAATTTCGATCAGTTAATAATATAGTAATAGCACCTGCTAATACAGGTAAAGATAATAACAATAAAATAGCAGTAATTAAAACTGATCAAATTAATAAAGAAATCTGATCTATTTTAACATTATAACACCGCATATTAAAAATAGTTCTAATAAAATTAATAGCTCCTATAATTGAAGAAATACCCGCTAAATGCAAAGAAAAAATAGCAAAATCTACTGATACACCTCTATGTCCTAAAGTTAATGATAAAGGAGGGTAAACAGTTCAACCAGTACCAACACCAGAATTTATTAAACCTCTTACTAATAAT…	1	1	0	0	0	1	1	1	0	1	1	1	0	1	1	1	1	0	0	0	0	0	0	0	0	0	0	0	0	0	0	0	1	0	0	1	1	0	0	1	0	1	0	0	0
OTU_22	Brevicoryne brassicae	second trophic level	94	GCTTTCCCACGAATAAATAATATTAGATTTTGATTACTCCCTCCATCACTAATAATAATAATTTGTAGTTTTTTAATTAATAATGGAACAGGAACAGGATGAACTATTTATCCACCTCTATCAAATAATATTGCTCATAATAATATTTCAGTTGATTTAACTATTTTTTCTTTACATTTAGCAGGAATTTCATCAATTTTAGGAGCAATTAATTTTATCTGTACAATTCTAAATATAATACCTAATAATATAAAATTAAATCAAATTCCTCTTTTTCCATGATCAATTTTAATTACAGCTATTTTATTAATCTTATCTCTCCCAGTATTAGCTGGAGCAATTACAATATTATTAACTGATCGAAATTTAAATACTTCATTTTTTGATCCAGCAGGAGGA…	0	0	1	0	0	0	0	0	1	0	1	0	0	1	0	1	0	0	0	1	0	0	1	1	1	0	1	1	0	1	0	0	0	1	0	1	1	0	0	1	0	1	1	1	0
OTU_23	Alloxysta tscheki	fourth trophic level	89	GCTTTCCCACGAATAAATAACATAAGATTTTGGTTATTGATCCCATCATTAATTTTATTAATTTCAAGGATATTTATTGATCAAGGGGCTGGGACAGGGTGAACTGTTTACCCTCCATTATCTTCTAATTTAGGTCACTCTGGGATTTCTGTCGATTTAACAATTTTTTCTTTACATATAAGAGGAGTTTCTTCAATTTTAGGGTCTATTAATTTTATTACTACAATTTTAAATATACGACCTGTAAATTTATCAATAGATAAAATTTCATTATTTATTTGATCTATCTTATTAACAACAATTTTATTATTATTATCATTGCCCGTGCTAGCCGGAGGGATTACTATATTGTTATTTGATCGAAATTTAAATACTTCTTTTTTTGACCCTATAGGAGGG…	0	0	0	1	0	0	0	0	0	0	0	0	0	0	0	0	0	0	0	0	0	0	0	0	0	0	0	0	0	0	0	0	0	0	0	0	0	0	0	0	0	1	0	0	0
OTU_24	/	fourth trophic level	35	GCTTTCCCACGAATAAATAATATAAGGTTTTGATTATTGATCCCGTCATTAATTTTATTAATTTCAAGAATATTTATTGATCAAGGAGCTGGTACAGGATGGACTGTTTACCCCCCATTATCTTCTAATTTAGGTCATTCTGGGATTTCTGTCGATTTAACAATTTTTTCTTTACATATAAGAGGGGTTTCTTCAATTTTAGGGTCTATTAATTTTATTACTACAATTTTAAATATGCGACCTGTAAATTTATCAATAGATAAAATCTCATTATTTATTTGATCTATTTTATTAACAACAATTTTATTATTATTATCATTGCCTGTTCTAGCTGGGGGGATTACTATATTATTATTTGATCGAAATTTAAATACTACTTTTTTTGATTTTGCTGGGGGA…	0	1	0	0	0	1	0	0	0	0	0	0	0	0	0	0	0	0	0	0	0	0	0	0	0	0	0	0	0	0	0	0	1	1	0	0	0	0	0	1	0	0	1	0	0
OTU_25	Diaeretiella rapae	third trophic level	47	GCTTTCCCACGAATAAATAATATAAGATTTTGATTATTAATTCCATCTTTAATTTTATTATTAGTAAGAGGTTTAATAAATTCTGGTGTTGGTACTGGTTGAACTGTTTACCCTCCTTTATCATTAACTTTAGGACATAGAGGTGTATCAGTAGATTTTGCTATTTTTTCTTTGCATTTAGCGGGTATTTCTTCAATTATAGGAGCTATTAATTTTATTAGAACTATTTTTAATATGCGGTGTTATAATGTTAAAATAGATCAGATTTCTTTATTAATTTGATCAGTTTTAATTACTGCTATTTTATTGTTATTATCTTTACCTGTATTAGCAGGTGCTATTACTATATTATTAACTGATCGAAATTTAAATACTTCTTTTTTTGACCCTATAGGGGGC…	0	1	0	0	0	1	0	0	0	0	0	0	0	0	0	0	0	0	0	0	0	0	0	0	0	0	1	0	0	1	1	0	1	1	0	3	0	0	0	1	0	0	0	0	0
OTU_26	Diaeretiella rapae	third trophic level	47	GCTTTCCCACGAATAAAGAAGAGAAGAGGGGGAGGAGGAAGGCCAGCGGGAATTTTATTATTAGTAAGAGGTTTAATAAATTCTGGTGTTGGTACTGGTTGAACTGTTTACCCTCCTTTATCATTAACTTTAGGACATAGAGGTGTATCAGTAGATTTTGCTATTTTTTCTTTGCATTTAGCGGGTATTTCTTCAATTATAGGAGCTATTAATTTTATTAGAACTATTTTTAATATGCGGTGTTATAATGTTAAAATAGATCAGATTTCTTTATTAATTTGATCAGTTTTAATTACTGCTATTTTATTGTTATTATCTTTACCTGTATTAGCAGGTGCTATTACTATATTATTAACTGATCGAAATTTAAATACTACTTTTTTTGATTTTGCTGGGGGA…	0	1	1	0	1	1	1	1	0	1	1	1	0	1	1	1	1	0	0	0	0	1	1	0	0	0	0	0	0	0	0	0	0	0	0	1	1	0	0	1	1	1	0	0	0
OTU_32	Diaeretiella rapae	third trophic level	2647	GCTTTCCCACGAATAAATAATATAAGATTTTGATTATTAATTCCATCTTTAATTTTATTATTAGTAAGAGGTTTAATAAATTCTGGTGTTGGTACTGGTTGAACTGTTTACCCTCCTTTATCATTAACTTTAGGACATAGAGGTGTATCAGTAGATTTTGCTATTTTTTCTTTGCATTTAGCGGGTATTTCTTCAATTATAGGAGCTATTAATTTTATTAGAACTATTTTTAATATGCGGTGTTATAATGTTAAAATAGATCAGATTTCTTTATTAATTTGATCAGTTTTAATTACTGCTATTTTATTGTTATTATCTTTACCTGTATTAGCAGGTGCTATTACTATATTATTAACTGATCGAAATTTAAATACTACTTTTTTTGATTTTGCTGGGGGA…	1	1	1	0	1	1	1	1	0	1	1	1	1	1	1	1	1	1	1	0	1	1	1	1	1	1	1	1	0	0	1	1	1	1	1	1	1	0	1	1	1	1	1	1	0
OTU_33	/	fourth trophic level	1649	GCTTTCCCACGAATAAATAATATAAGATTTTGATTGCTTCCTCCTAGATTTACATTATTAATTTTTAGAATATTTATTGGTTTAGGAACTGGAACAGGTTGAACTGTAAATCCACCTTTATCATCCAATATTTCTCATAGAGGTCCTTCAGTTGATTTATCAATTTTTTCTTTACATATTGCTAGAATTTCATCAATTATGGGTTTTAATTTCATTTCAACTATTTTAAATACAAAAATTTATAAGATTGAAAATGTTCCATTATTTAGATGAGCAATATTATTAACAGCAATTTTATTACTTTTATCTTTACCAGTATTAGCAGGTGCTATTACTATACTGCTTTTTGATCGAAATTACAATACATCGTTTTTTGATCCTTCAGGAGGAGGTGATCCA…	0	0	0	0	0	0	0	0	0	0	0	0	0	0	0	0	0	0	0	0	0	0	0	0	0	0	1	1	0	0	1	0	0	0	0	0	0	0	0	0	0	0	0	0	0
OTU_34	Asaphes vulgaris	fourth trophic level	118	GCTTTCCCACGAATAAATAATATAAGATTTTGATTACTCCCCCCCAGATTTATATTATTAATTTTTAGGATATTTATTGGATCTGGGACTGGAACTGGTTGAACAGTTTATCCTCCTTTATCCTCTAATATTTCTCATAGTGGTCCTTCAGTAGATTTATCTATTTTTTCTTTACATATTGCTGGAGTTTCCTCAATCATAGGTTCAATTAATTTTATTTCAACTATTTTAAATATAAAAACTTATAAAATTGAAAGAGTTCCTTTGTTTAGTTGAGCAATACTACTAACAGCAATTTTATTACTACTTTCTTTACCGGTATTAGCTGGTGCAATTACTATATTACTTTTTGATCGAAATTTAAATACATCATTTTTTGATCCTTCGGGGGGGGGTGAT…	0	0	0	1	0	0	0	0	0	0	0	0	0	0	0	1	0	0	0	0	0	0	0	0	0	0	1	1	0	0	1	0	0	0	0	1	0	0	0	0	0	1	0	1	0
OTU_35	/	fourth trophic level	15	GCTTTCCCACGAATAAATAATATAAGATTCTGATTACTCCCCCCCAGATTTATATTATTAATTTTTAGAATATTTATTGGATCAGGAACCGGAACTGGTTGAACAGTTTATCCTCCTTTATCTTCTAATATTTCCCATAGAGGACCTTTAGTTGATACGTCTATTTTTTCTTTACATATTTCTGGAGTTTCATCTATCATAGGTTCAAATAATTTTATTTCAACTATTCTAAATATAAAAATTTATAAAATTGAAAGAGTACCTTTGTTTAGGTGAGCAATATTATTGACAGCAACTTTACTATTATTATCCTTACCAGTATCAGCAGGTGCAATTACTATACTGCTTTTTAATCGAAATTTAAATACATCATTTTTTGATCTATCAGGAGGGGGAGAT…	0	0	0	0	0	0	0	0	0	0	0	0	0	0	0	0	0	0	0	0	0	0	0	0	0	0	1	1	0	0	0	0	0	0	0	0	0	0	0	0	0	0	0	0	0
OTU_36	Asaphes vulgaris	fourth trophic level	11	GCTTTCCCACGAATAAATAATATAAGATTCTGATTGCTCCCCCCCAGATTTATATTATTAATTTTTAGAATATTTATTGGATCAGGAACCGGAACTGGTTGAACAGTTTATCCTCCTTTATCTTCAAATATTTCCCATAGAGGACCTTCAGTTGATTTGTCTATTTTTTCTTTACATATTGCTGGAGTTTCATCTATCATAGGTTCAATTAATTTTATTTCAACTATTTTAAATATAAAAATTTATAAAATTGAAAGAGTACCTTTGTTTAGATGAGCAATATTATTGACAGCAATTTTACTATTATTATCCTTACGAGTATTAGCAGGTGCAATTACTATACTGCTTTTTGATCGAAATTTAAATACGTCATTTTTTGATCCATCAGGAGGGGGAGAT…	0	0	0	0	0	0	0	0	0	0	0	0	0	0	0	0	0	0	0	0	0	0	0	0	0	0	1	1	0	0	0	0	0	0	0	0	0	0	0	0	0	0	0	0	0
OTU_39	/	fourth trophic level	20	GCTTTCCCACGAATAAATAATATAAGATTCTGATTGCTTCCTCCCAGATTTATATTATTAATTTTTAGAATATTTATTGGATCTGGAACTGGAACTGGTTGAACAGTTTATCCTCCTTTATCCTCCAATATTTCTCATAGAGGACCTTCAGTTGAATTGTCAATTTTTTCTTTACATATTGCTGGAGTTTCATCTATTATAGGTTCAATTAATTTTATTTCAACTATTTTAAATATAAAAATTTATAAAATTGAAAGAGTACCTTTATTTAGATGAGCAATATTAATGACAGCAATTTTACTATTATTATCCTTACCAGTATTAGCAGGTGCAATTACTATATTACTTTTTGATCGAAATTTAAATACATCATTTTTTGATCCGTCAGGGGGGGAGATC…	0	0	0	0	0	0	0	0	0	0	0	0	0	0	0	0	0	0	0	0	0	0	0	0	0	0	1	1	0	0	1	0	0	0	0	0	0	0	0	0	0	0	0	0	0
OTU_48	Diaeretiella rapae	third trophic level	2	GCTTTCCCACGAATAAATAATATAAGATTTTGATTATTAATTCCATCTTTAATTTTATTATTAGTAAGAGGTTTAATAAATTCTGGTGTTGGTACTGGTTGAACTGTTTACCCTCCTTTATCATTAACTTTAGGACATAGAGGTGTATCAGTAGATTTTGCTATTTTTTCTTTGCATTTAGCGGGTATTTCTTCAATTATAGGAGCTATTAATTTTATTAGAACTATTTTTAATATGCGGTGTTATAATGTTAAAATAGATCAGATTTCTTTATTAATTTGATCAGTTTTAATTACTGCTATTTTATTGTTATTATCTTTACCTGTATTAGCAGGTGCTATTACTATATTATTAACTGATCGAAATTTAAATACTACTTTTTTTGATTTTGCTGGGGGA…	0	0	0	0	0	1	0	0	0	0	0	0	0	0	0	0	0	0	0	0	0	0	0	0	0	0	0	0	0	0	0	0	0	0	0	0	0	0	0	0	0	0	0	0	0
OTU_50	Diaeretiella rapae	third trophic level	16	GCTTTCCCACGAATAAATAATATAAGATTTTGATTATTAATTCCATCTTTAATTTTATTATTAGTAAGAGGTTTAATAAATTCTGGTGTTGGTACTGGTTGAACTGTTTACCCTCCTTTATCATTAACTTTAGGACATAGAGGTGTATCAGTAGATTTTGCTATTTTTTCTTTGCATTTAGCGGGTATTTCTTCAATTATAGGAGCTATTAATTTTATTAGAACTATTTTTAATATGCGGTGTTATAATGTTAAAATAGATCAGATTTCTTTATTAATTTGATCAGTTTTAATTACTGCTATTTTATTGTTATTATCTTTACCTGTATTAGCAGGTGCTATTACTATATTATTAACTGATCGAAATTTAAATACTACTTTTTTTGATTTTTTGGACATC…	0	0	0	0	0	0	1	1	0	1	0	0	0	1	1	1	0	0	0	0	0	0	0	0	0	0	0	0	0	0	0	0	1	0	0	1	0	0	0	1	0	0	0	0	0
OTU_51	Alloxysta consobrina	fourth trophic level	4	GCTTTCCCACGAATAAATAATATAAGGTTTTGATTATTGATCCCGTCATTAATTTTATTAATTTCAAGAATATTTATTGATCAAGGAGCTGGTACAGGATGGACTGTTTACCCCCCATTATCTTCTAATTTAGGTCATTCTGGGATTTCTGTCGATTTAACAATTTTTTCTTTACATATAAGAGGGGTTTCTTCAATTTTAGGGTCTATTAATTTTATTACTACAATTTTAAATATGCGACCTGTAAATTTATCAATAGATAAAATCTCATTATTTATTTGATCTATTTTATTAACAACAATTTTATTATTATTATCATTGCCTGTTCTAGCTGGGGGAGGTGATCCTATTTTATATCAACATTTATTTTGATTTTTGGACATCCAGAAGTTTA	0	1	0	0	0	1	0	0	0	0	0	0	0	0	0	0	0	0	0	0	0	0	0	0	0	0	0	0	0	0	0	0	0	0	0	0	0	0	0	0	0	0	0	0	0
OTU_55	Diaeretiella rapae	third trophic level	5	GCTTTCCCACGAATAAATAATATAAGATTTTGCTATTTTTTCTTTGCATTTAGCGGGTATTTCTTCAATTATAGGAGCTATTAATTTTATTAGAACTATTTTTAATATGCGGTGTTATAATGTTAAAATAGATCAGATTTCTTTATTAATTTGATCAGTTTTAATTACTGCTATTTTATTGTTATTATCTTTACCTGTATTAGCAGGTGCTATTACTATATTATTAACTGATCGAAATTTAAATACTACTTTTTTTGATTTTGCTGGGGGAGGTGATCCTATTTTATATCAACATTTATTTTGATTTTTTGGACATCCAGAAGTTTA	1	0	0	0	0	0	0	1	0	0	1	1	0	0	0	1	0	0	0	0	0	0	0	0	0	0	0	0	0	0	0	0	0	0	0	0	0	0	0	0	0	0	0	0	0
OTU_56	Diaeretiella rapae	third trophic level	13	GCTTTCCCACGAATAAATAATATAAGATTTTGATTATTAATTCCATCTTTAATTTTATTATTAGTAAGAGGTCTAATAAATTCTGGTGTTGGTACTGGTTGAACTGTTTACCCTCCTTTATCATTAACTTTAGGACATAGAGGTGTATCAGTAGATTTTGCTATTTTATTGTTATTATCTTTACCTGTATTAGCAGGTGCTATTACTATATTATTAACTGATCGAAATTTAAATACTACTTTTTTTGATTTTGCTGGGGGAGGTGATCCTATTTTATATCAACATTTATTTTGATTTTTTGGACATCCAGAAGTTTA	0	0	0	0	0	1	0	0	0	0	1	1	0	1	0	1	0	0	0	0	0	0	0	0	0	0	0	0	0	0	0	0	0	0	0	0	0	0	0	0	0	0	0	0	0
OTU_57	Diaeretiella rapae	third trophic level	14	GCTTTCCCACGAATAAATAATATAAGATTTTGATTATTAATTCCATCTTTAATTTTATTAGAACTATTTTTAATATGCGGTGTTATAATGTTAAAATAGATCAGATTTCTTTATTAATTTGATCAGTTTTAATTACTGCTATTTTATTGTTATTATCTTTACCTGTATTAGCAGGTGCTATTACTATATTATTAACTGATCGAAATTTAAATACTACTTTTTTTGATTTTGCTGGGGGAGGTGATCCTATTTTATATCAACATTTATTTTGATTTTTTGGACATCCAGAAGTTTA	1	1	0	0	0	1	0	0	0	0	1	1	0	1	1	1	1	0	0	0	0	0	0	0	0	0	0	0	0	0	0	0	0	0	0	0	0	0	0	0	0	0	0	0	0
OTU_58	Diaeretiella rapae	third trophic level	7	GCTTTCCCACGAATAAATAATATAAGATTTTGATTATTAATTCCATCTTTAATTTTATTATTAGTAAGAGGTTTAATAAATTCTGGTGTTGGTACTGGTTGAACTGTTTACCCTCCTTTATCATTAACTTTAGGACATAGAGGTGTATCAGTAGATTTTGCTATTTTTTCTTTGCATTTAGCGGGGGGAGGTGATCCTATTTTATATCAACATTTATTTTGATTTTTTGGACATCCAGAAGTTTA	1	1	0	0	0	0	0	0	0	0	1	1	0	0	0	0	1	0	0	0	0	0	1	0	0	0	0	0	0	0	0	0	0	0	0	1	0	0	0	0	0	0	0	0	0
OTU_60	Diaeretiella rapae	third trophic level	3	GCTTTCCCACGAATAAATAATATAAGATTTTGATTATTAATTCCATCTTTAATTTTATTATTAGTAAGAGGTTTAATAAATTCTGGTGTTGGTACTGGTTGAACTGTTTACCCTCCTTTATCATTAACTTTAGGACATAGAGGTGTATCAGTAGATTTTGCTATTTTTTTGATTTTGCTGGGGGAGGTGATCCTATTTTATATCAACATTTATTTTGATTTTTTGGACATCCAGAAGTTTA	0	0	0	0	0	1	0	0	0	0	1	0	0	0	0	0	0	0	0	0	0	0	0	0	0	0	0	0	0	0	0	0	0	0	0	0	0	0	0	0	0	0	0	0	0
OTU_61	Diaeretiella rapae	third trophic level	3	GCTTTCCCACGAATAAATAATATAAGATTTTGATTATTAATTCCATCTTTAATTTTATTATTAGTAAGAGGTTTAATAAATTCTGGTGTTGGTACTGGTTGAACTGTTTACCCTCCTTTATCATTAACTGATCGAAATTTAAATACTACTTTTTTTGATTTTGCTGGGGGAGGTGATCCTATTTTATATCAACATTTATTTTGATTTTTTGGACATCCAGAAGTTTA	0	0	0	0	0	0	0	0	0	0	0	1	0	0	0	1	0	0	0	0	0	0	0	0	0	0	0	0	0	0	0	0	0	0	0	0	0	0	0	0	0	0	0	0	0
OTU_62	Diaeretiella rapae	third trophic level	52	GCTTTCCCACGAATAAATAATATAAGATTTTGATTATTAATTCCATCTTTAATTTTATTATTAGTAAGAGGTTTAATAAATTCTGGTGTTGGTACTGGTTGAACTGTTTACCCTCCTTTATCATTAACTTTAGGACATAGAGGTGTATCAGTAGATTTTGCTGGGGGAGGTGATCCTATTTTATATCAACATTTATTTTGATTTTTTGGACATCCAGAAGTTAA	1	1	0	0	1	1	1	1	0	1	1	1	0	1	1	1	1	0	0	0	0	1	0	0	0	0	0	0	0	0	0	0	0	0	0	1	0	0	0	0	0	0	0	0	0
[truncated: 5 more columns]
